# Supplementary material for: Experimental infection of lambs with tick-borne encephalitis virus and co-infection with Anaplasma phagocytophilum
Source: PLoS One. 2019 Dec 19;14(12):e0226836. doi: 10.1371/journal.pone.0226836 (PMC6922421; doi:10.1371/journal.pone.0226836)
Supplement: S1 Table — Abbreviations in S1 Table: TBEV PCR: Tick-borne encephalitis virus real-time polymerase chain reaction (0 = negative, 1 = positive) TBEV ELISA: Tick-borne encephalitis enzyme-linked immunosorbent assay (0 = negative, 1 = positive) TBEV titer: Tick-borne encephalitis titer by serum neutralization test Wbc: White blood cells Rbs: Red blood cells Hgb: Hemoglobin Hct: Hematocrit MCV: Mean cell volume MCH: Mean cellular hemoglobin RDV: Red cell distribution width HDW: Hemoglobin distribution width Neut: Neutrophils Lymp: Lymphocytes Mono: Monocytes Eos: Eosinophils Baso: Basophils LUC: Large unstained cells. (XLSX) [file pone.0226836.s001.xlsx]

## Sheet: Ark1
Year	Day of experiment	Animal no	Group	Rectal temperature °C	TBEV PCR Ct.	TBE ELISA	TBE titer	A. phagocytophilum PCR concentration	A. phagocytophilum PCR concentration LOG10	Wbc	Rbc	Hgb	Hct	MCV	MCH	RDW	HDW	Neut	Lymp	Mono	Eos	Baso	LUC
								copies/µL	copies/µL	109/ l	1012/l	g/l	%	fl	pg	%	g/l	109/ l	109/ l	109/ l	109/ l	109/ l	109/ l
										4,5-12,0	9,0-14,0	90-140	27,0-40,0	25,0-35,0	8,0-12,0	15,0-30,0	17,0-25,0	0,8-5,0	1,2-6,0	<0,75	<1,0	<0,3	<0,25
2017	0	8	1	39.5	0	0	0	0	0	11.31	11.98	114	32.1	26.8	9.6	18.2	25.8	4	6.31	0.51	0.39	0.08	0.01
2017	0	36	1	39.7	0	0	0	0	0	9.34	10.82	103	28.3	26.2	9.5	17.1	24.9	4.54	3.89	0.38	0.36	0.1	0.08
2017	0	78	1	39.5	0	0	0	0	0	12.75	11.73	117	34	29	10	18.4	24.2	3.34	8.75	0.36	0.12	0.08	0.1
2017	0	119	1	39.6	0	0	0	0	0	15.05	10.85	114	32.1	30.3	10.8	18.3	27.2	3.9	9.66	0.8	0.44	0.12	0.14
2017	0	264	1	39.7	0	0	0	0	0	13.11	10.54	105	31.3	29.7	10	18.8	24.9	7.02	4.14	1.29	0.37	0.12	0.17
2017	1	8	1	39.3
2017	1	36	1	40.7
2017	1	78	1	39.5
2017	1	119	1	39.2
2017	1	264	1	39.6
2017	2	8	1	38.8	32.55	0	0	0	0	8.1	11.1	108	30.5	27.4	9.7	18.5	26.3	3.33	3.94	0.48	0.22	0.08	0.07
2017	2	36	1	39.3	0	0	0	0	0	8.56	10.88	107	28.7	26.4	9.9	17.2	24.9	4.03	3.17	0.94	0.18	0.09	0.15
2017	2	78	1	39.3	30.4	0	0	0	0	11.28	11.39	114	33.6	29.5	10	18.6	24.6	2.54	7.82	0.71	0.11	0.09	0.01
2017	2	119	1	39.2	31.01	0	0	0	0	9.68	9.74	105	29.7	30.5	10.8	18.1	27.1	2.69	6.29	0.4	0.19	0.08	0.03
2017	2	264	1	39.4	28.3	0	0	0	0	12.97	10.41	105	30.9	29.6	10.1	18.7	25	7.54	4.16	0.81	0.27	0.08	0.11
2017	3	8	1	39.1
2017	3	36	1	39.3
2017	3	78	1	39.3
2017	3	119	1	39.6
2017	3	264	1	40.1
2017	4	8	1	38.7	0	0	0	0	0	9.78	13.03	130	37.7	28.9	10	18.3	23.9	4.6	3.85	0.96	0.26	0.08	0.03
2017	4	36	1	39	0	0	0	0	0	7.29	11.39	111	31.3	27.5	9.8	17	23.6	2.49	4.22	0.15	0.26	0.06	0.12
2017	4	78	1	39.3	0	0	0	0	0	12.63	11.81	119	36.4	30.8	10.1	18.1	22.2	3.87	8.23	0.32	0.09	0.09	0.03
2017	4	119	1	39.4	0	0	0	0	0	12.76	10.55	116	33.3	31.6	11	18.1	25.8	4.27	7.42	0.64	0.29	0.1	0.03
2017	4	264	1	39.6	0	0	0	0	0	13.88	10.93	113	33.5	30.7	10.4	18.7	24.3	7.93	5.1	0.44	0.32	0.07	0.02
2017	5	8	1	39.2
2017	5	36	1	39.4
2017	5	78	1	39.4
2017	5	119	1	39.4
2017	5	264	1	39.8
2017	6	8	1	39.1	0	1	80	0	0	9.52	11.37	108	30.7	27	9.5	18.7	26.5	4	4.25	0.9	0.14	0.07	0.16
2017	6	36	1	39.3	0	1	15	0	0	7.74	10.64	102	27.7	26	9.6	17.1	25.3	2.89	3.37	1.05	0.27	0.06	0.1
2017	6	78	1	39.4	0	1	40	0	0	12.46	11.06	110	32.1	29	10	18.8	24.9	3.41	7.07	1.72	0.08	0.08	0.11
2017	6	119	1	39.6	0	1	30	0	0	13.49	9.3	101	28	30.1	10.9	18.7	27.5	4.45	7.86	0.83	0.2	0.09	0.05
2017	6	264	1	39.7	0	0	15	0	0	13.19	10.35	106	30.3	29.3	10.2	18.6	25.2	6.59	5.35	0.7	0.34	0.1	0.11
2017	7	8	1	39
2017	7	36	1	39.5
2017	7	78	1	39.9
2017	7	119	1	39.6
2017	7	264	1	39.6
2017	8	8	1	39.1	0	1	320	0	0	9.02	11.38	111	31	27.3	9.8	18.7	26.7	3.72	4.52	0.51	0.19	0.06	0.02
2017	8	36	1	39.5	0	0	40	0	0	10.04	10.77	105	28.5	26.4	9.7	17.3	25.6	5.88	3.42	0.43	0.25	0.05	0.01
2017	8	78	1	39.7	0	1	120	0	0	11.73	11.04	112	32.7	29.6	10.1	18.8	24.9	4.24	6.84	0.36	0.11	0.08	0.1
2017	8	119	1	39.7	0	1	80	0	0	11.9	9.42	103	29	30.7	10.9	19.2	28.1	4.36	6.68	0.57	0.2	0.08	0.02
2017	8	264	1	39.8	0	1	120	0	0	12.99	10.43	107	31.2	29.9	10.2	18.6	24.8	7.29	4.22	0.93	0.39	0.09	0.07
2017	9	8	1	39.4
2017	9	36	1	39.7
2017	9	78	1	39.7
2017	9	119	1	39.7
2017	9	264	1	39.8
2017	10	8	1	39.4	0	1	240	0	0	7.22	11.24	109	30.6	27.2	9.7	18.9	26.8	3.58	2.98	0.35	0.24	0.06	0.01
2017	10	36	1	39.5	0	1	20	0	0	9.63	9.9	96	26.1	26.4	9.7	17.7	26.1	5.36	3.37	0.48	0.33	0.08	0.01
2017	10	78	1	39.7	0	1	120	0	0	8.66	11.28	114	33.5	29.7	10.1	19	25.5	3.64	3.3	1.46	0.11	0.04	0.11
2017	10	119	1	39.6	0	1	160	0	0	8.44	9.17	101	28.2	30.8	11	19.6	28.2	3.04	4.72	0.3	0.25	0.08	0.05
2017	10	264	1	40.7	0	1	120	0	0	29.25	10.59	110	31.4	29.6	10.4	18.8	25.7	23.53	4.73	0.78	0.11	0.08	0.02
2017	11	8	1	39
2017	11	36	1	39.6
2017	11	78	1	39.5
2017	11	119	1	39.3
2017	11	264	1	39.5
2017	12	8	1	39.4
2017	12	36	1	39.5
2017	12	78	1	39.5
2017	12	119	1	39
2017	12	264	1	39.5
2017	13	8	1	39.3
2017	13	36	1	39.2
2017	13	78	1	39.8
2017	13	119	1	39.5
2017	13	264	1	39.5
2017	14	8	1	39.4	0	1	240	0	0	11.92	11.45	112	31.5	27.5	9.8	18.8	26.1	5.46	5.3	0.76	0.21	0.06	0.12
2017	14	36	1	39.4	0	1	20	0	0	8.56	10.74	104	28.6	26.6	9.7	17.5	25.2	3.52	4.01	0.6	0.36	0.06	0.01
2017	14	78	1	39.5	0	1	120	0	0	11.11	10.97	113	32.7	29.8	10.3	18.7	25.4	3.07	7.52	0.33	0.08	0.08	0.03
2017	14	119	1	39.8	0	1	160	0	0	10.95	9.66	107	29.9	31	11.1	19.4	28.7	4	6.12	0.6	0.11	0.09	0.02
2017	14	264	1	39.3	0	1	160	0	0	10.52	10.19	105	30.4	29.8	10.3	18.5	25.9	4.6	4.49	0.46	0.87	0.09	0.01
2017	15	8	1	39.2
2017	15	36	1	39.5
2017	15	78	1	39.4
2017	15	119	1	39.3
2017	15	264	1	40.6
2017	16	8	1	39.2
2017	16	36	1	39
2017	16	78	1	39.2
2017	16	119	1	39.4
2017	16	264	1	39.5
2017	17	8	1	39.4
2017	17	36	1	39.5
2017	17	78	1	39.4
2017	17	119	1	39.7
2017	17	264	1	39.6
2017	18	8	1	39.6	0	1	120	0	0	10.31	10.9	107	31.1	28.6	9.8	18.2	23.9	4.73	4.86	0.17	0.35	0.07	0.13
2017	18	36	1	39.7	0	1	10	0	0	7.86	10.76	105	30	27.9	9.7	17.3	24.3	3.16	4.09	0.06	0.41	0.05	0.08
2017	18	78	1	39.5	0	1	80	0	0	10.64	10.08	104	31.4	31.1	10.4	17.8	22.5	2.47	7.51	0.46	0.1	0.1	0
2017	18	119	1	39.4	0	1	80	0	0	9.04	9.51	107	30.8	32.4	11.2	18.9	26	1.85	6.64	0.33	0.13	0.07	0.02
2017	18	264	1	40.1	0	1	120	0	0	23.38	9.94	104	30.1	30.3	10.5	18.2	25.5	15.87	6.08	0.77	0.55	0.1	0.02
2017	19	8	1	39.3
2017	19	36	1	39.4
2017	19	78	1	39.3
2017	19	119	1	39.2
2017	19	264	1	39.8
2017	20	8	1	39.1
2017	20	36	1	39.3
2017	20	78	1	38.9
2017	20	119	1	39.4
2017	20	264	1	39.9
2017	21	8	1	39.2	0	1	80	0	0	8.62	11.7	113	32.8	28	9.7	18.4	25.5	3.28	4.5	0.55	0.2	0.06	0.03
2017	21	36	1	39.5	0	1	20	0	0	7.97	10.92	107	29.6	27.1	9.8	17.8	25.8	3.28	3.9	0.45	0.23	0.1	0.01
2017	21	78	1	39.3	0	1	80	0	0	11.39	11.19	115	34.5	30.9	10.2	18.2	24.8	2.71	6.69	1.76	0.05	0.09	0.1
2017	21	119	1	39.5	0	1	80	0	0	8.37	9.85	110	31.8	32.3	11.2	19.3	27.3	1.55	6.02	0.63	0.07	0.08	0.03
2017	21	264	1	39.7	0	1	80	0	0	16.01	10.56	109	32.2	30.4	10.3	18.4	26.4	10.13	4.56	0.88	0.22	0.06	0.17
2017	22	8	1	39.2
2017	22	36	1	39.2
2017	22	78	1	39.1
2017	22	119	1	39.2
2017	22	264	1	39.1
2017	23	8	1	39.1				131.304	2.12157	9.31	11.32	110	31.7	28	9.8	18.4	25	3.96	4.33	0.73	0.19	0.07	0.03
2017	23	36	1	39.2				119.999	2.08278	7.39	10.25	101	27.8	27.2	9.8	18.1	25.5	3.07	3.53	0.39	0.25	0.09	0.06
2017	23	78	1	39.3				0	0	10.94	10.82	110	33.2	30.7	10.2	18.4	24.5	3.08	5.9	1.71	0.05	0.09	0.11
2017	23	119	1	39.2				141.156	2.15276	9.44	9.63	108	30.7	31.9	11.2	19.4	27.5	1.94	6.79	0.54	0.07	0.09	0
2017	23	264	1	39.5				109.447	2.04315	16.02	10.23	106	31	30.3	10.4	18.2	25.8	9.82	4.68	1.03	0.34	0.08	0.07
2017	24	8	1	39.3
2017	24	36	1	40.6
2017	24	78	1	39.2
2017	24	119	1	40.6
2017	24	264	1	40.3
2017	25	8	1	41.7				127284	5.10478	2.63	10.67	109	29.9	28	10.2	18.2	23.4	1.28	1.06	0.03	0.1	0.01	0.14
2017	25	36	1	41.8				351824	5.54633	4.46	10.12	103	27.6	27.3	10.2	17.7	23.9	2.69	1.23	0.25	0.09	0.01	0.19
2017	25	78	1	40.6				34515.8	4.53803	8.98	10.49	112	32.9	31.4	10.6	17.9	22.3	4.53	4.11	0.14	0.06	0.07	0.07
2017	25	119	1	42.2				247343	5.3933	5.35	9.68	113	30.6	31.6	11.7	18.9	26.8	2.88	2.09	0.11	0.11	0.02	0.14
2017	25	264	1	41.4				1.08992e+06	6.03739	17.2	9.88	106	29.3	29.6	10.7	18	25.4	12.18	2.21	0.7	1.9	0.05	0.16
2017	26	8	1	41.7
2017	26	36	1	42.1
2017	26	78	1	41.9
2017	26	119	1	41.9
2017	26	264	1	41.4
2017	27	8	1	40.6				375213	5.57428	5.62	12.22	121	33.2	27.1	9.9	18.7	26.6	3.63	1.47	0.35	0.06	0.01	0.11
2017	27	36	1	41				280237	5.44753	6.14	11.72	114	31	26.4	9.7	18.4	27	4.05	1.31	0.56	0.07	0.02	0.13
2017	27	78	1	41.3				381880	5.58193	7.1	10.9	114	32.3	29.7	10.5	18.4	24.9	4.81	1.68	0.5	0.04	0	0.07
2017	27	119	1	40.9				236952	5.37466	6.47	10.11	116	31.2	30.9	11.5	19.3	29.9	3.68	2.08	0.25	0.05	0.02	0.38
2017	27	264	1	41.4				108554	5.03565	14.21	10.44	109	30.4	29.1	10.4	18	26.5	10.25	1.73	1.69	0.23	0.03	0.29
2017	28	8	1	40.2
2017	28	36	1	40.5
2017	28	78	1	41.1
2017	28	119	1	40.2
2017	28	264	1	41.4
2017	29	8	1	40.8				82409.8	4.91598	4.49	10.7	105	29	27.1	9.8	18.6	26	1.9	1.77	0.41	0.1	0.02	0.28
2017	29	36	1	40.5				170267	5.23113	4.51	10.5	103	28	26.7	9.9	18.8	28.2	2	1.58	0.54	0.06	0.04	0.3
2017	29	78	1	40.3				249117	5.39641	5.61	10.46	109	31	29.6	10.4	18.3	25.4	3.16	1.91	0.16	0.07	0.03	0.28
2017	29	119	1	41.1				115685	5.06328	5.65	8.98	100	28.2	31.4	11.2	19.3	29.3	1.87	2.83	0.59	0.09	0.03	0.24
2017	29	264	1	40.9				0	0	14.51	9.53	100	27.8	29.1	10.5	17.8	24.7	10.19	2.18	1.1	0.18	0.05	0.81
2017	30	8	1	40.1
2017	30	36	1	39.7
2017	30	78	1	40.3
2017	30	119	1	40.3
2017	30	264	1	40.8
2017	31	8	1	40.5				3690.94	3.56725	4.65	10.84	106	29.3	27.1	9.8	18.5	25.8	0.89	2.92	0.5	0.07	0.04	0.24
2017	31	36	1	40.7				56196.9	4.74972	4.15	10.76	104	28.6	26.6	9.7	18.7	27.3	0.63	2.57	0.59	0.05	0.04	0.28
2017	31	78	1	40.4				3262.34	3.51366	6.72	9.82	104	29.4	29.9	10.6	18.3	24.9	1.56	4.12	0.8	0.09	0.08	0.06
2017	31	119	1	40.2				6333.9	3.80174	7.38	9.16	102	28.7	31.3	11.2	19.2	29.4	0.43	5.54	1.12	0.04	0.08	0.17
2017	31	264	1	41.2				564736	5.75185	14.51	9.63	98	28.1	29.2	10.2	18.1	24.5	8.09	4.7	1.04	0.1	0.12	0.46
2017	32	8	1	40.1
2017	32	36	1	39.7
2017	32	78	1	40.5
2017	32	119	1	40.2
2017	32	264	1	40.6
2017	33	8	1	39.9
2017	33	36	1	39.8
2017	33	78	1	40
2017	33	119	1	39.9
2017	33	264	1	40
2017	34	8	1	40.3
2017	34	36	1	39.7
2017	34	78	1	39.8
2017	34	119	1	39.7
2017	34	264	1	39.5
2017	35	8	1	40.2				1076.71	3.0325	4.8	10.77	106	29.1	27	9.8	18.9	25.9	0.88	3.01	0.57	0.08	0.04	0.22
2017	35	36	1	39.5				357.954	2.55504	3.82	10.57	103	28.3	26.8	9.7	18.8	27.3	0.7	2.14	0.73	0.07	0.01	0.17
2017	35	78	1	39.6				665.633	2.82389	6.92	9.55	100	29.1	30.5	10.5	18.8	24.5	1.33	4.01	1.31	0.12	0.03	0.12
2017	35	119	1	39.9				7496.94	3.87494	6.3	9.13	102	28.6	31.3	11.2	18.8	28.2	0.96	3.2	1.95	0.05	0.04	0.09
2017	35	264	1	39.4				0	0	9.92	9.85	101	29.4	29.9	10.3	20.5	25.6	1.86	4.3	3.4	0.12	0.08	0.16
2017	36	8	1	39.4
2017	36	36	1	39.4
2017	36	78	1	39.6
2017	36	119	1	39.8
2017	36	264	1	39.8
2017	37	8	1	39.1
2017	37	36	1	39.7
2017	37	78	1	40.6
2017	37	119	1	39.5
2017	37	264	1	39.5
2017	38	8	1	40.6
2017	38	36	1	39.3
2017	38	78	1	39.4
2017	38	119	1	39.3
2017	38	264	1	39.4
2017	39	8	1	40.2				31854	4.50318	8.4	10.92	105	30	27.5	9.6	18.7	25.2	5.94	1.57	0.69	0.08	0.03	0.09
2017	39	36	1	39.2				61.5	1.79588	3.36	10.5	100	28.5	27.1	9.6	18.8	26.6	0.47	1.92	0.76	0.08	0.02	0.11
2017	39	78	1	39.3				319.5	2.50583	7.47	10.07	105	30.7	30.5	10.4	19.3	24.5	0.56	4.89	1.37	0.07	0.04	0.55
2017	39	119	1	39.7				9.5	1.02119	6.64	9.31	102	29.8	32	11	18.8	27.9	1.02	3.45	1.96	0.08	0.02	0.11
2017	39	264	1	39.4				1456	3.16346	12.09	10.12	108	30.9	30.5	10.7	22.9	26.9	2.58	7.2	2.08	0.1	0.09	0.04
2017	40	8	1	38.8
2017	40	36	1	39.1
2017	40	78	1	38.8
2017	40	119	1	39
2017	40	264	1	40.1
2017	41	8	1	39.1
2017	41	36	1	39.1
2017	41	78	1	39.2
2017	41	119	1	38.7
2017	41	264	1	39.4
2017	42	8	1	39.1				0	0	4.75	10.64	103	29.1	27.4	9.7	18.8	25.8	1.32	2.56	0.64	0.12	0.03	0.09
2017	42	36	1	38.7				0	0	6.64	10.23	100	28.2	27.6	9.8	18.5	25.3	2.81	3.3	0.16	0.2	0.05	0.11
2017	42	78	1	39.1				0	0	8.87	10.2	107	31.4	30.8	10.5	19	24	2.79	5.24	0.72	0.07	0.03	0.02
2017	42	119	1	39.3				46	1.6721	9.65	9.09	101	29.2	32.1	11.2	18.5	27.2	2.62	6.02	0.61	0.28	0.1	0.01
2017	42	264	1	39.8				351.5	2.54716	17.31	10.98	115	34.4	31.4	10.5	23	26.6	5.92	9.86	1.21	0.11	0.09	0.12
2017	0	11	2	39.4				0	0	13.31	10.55	107	30.8	29.2	10.2	15.2	23.1	4.07	8.34	0.45	0.22	0.1	0.12
2017	0	48	2	39.3				0	0	8.97	11.73	122	35	29.8	10.4	17.1	25.6	2.75	4.92	0.76	0.33	0.09	0.12
2017	0	93	2	39.7				0	0	15.7	10.62	111	32.4	30.5	10.5	18.3	23	4.34	9.49	0.74	0.93	0.14	0.05
2017	0	149	2	39.3				0	0	13.98	10.2	105	30.4	29.8	10.3	17.2	21.2	5.41	7.91	0.36	0.18	0.09	0.04
2017	0	263	2	39.4				0	0	5.78	10.9	113	33.1	30.4	10.4	18.2	22.1	1.94	3.47	0.13	0.17	0.04	0.04
2017	1	11	2	39.2
2017	1	48	2	39.6
2017	1	93	2	38.7
2017	1	149	2	39.1
2017	1	263	2	39.3
2017	2	11	2	39.1				54.7833	1.7465	10.13	10.61	109	31.3	29.5	10.3	15.1	22.7	2.36	7.26	0.11	0.19	0.09	0.11
2017	2	48	2	39.7				237.894	2.3782	9.32	11.94	125	35.6	29.8	10.5	17	26.1	3.03	5.11	0.81	0.26	0.07	0.04
2017	2	93	2	39				0	0	15.69	11.47	121	35.1	30.6	10.5	18.4	23.9	3.2	10.45	0.82	0.99	0.17	0.05
2017	2	149	2	39.1				0.967135	0.293834	13.22	10.84	113	32.5	30	10.4	17.4	21.8	3.45	8.94	0.29	0.18	0.16	0.2
2017	2	263	2	39.5				57.4457	1.76675	4.01	10.58	112	32.2	30.5	10.6	18.3	22.8	1.37	2.36	0.12	0.12	0.02	0.03
2017	3	11	2	40.6
2017	3	48	2	40.5
2017	3	93	2	39.4
2017	3	149	2	40.2
2017	3	263	2	39.9
2017	4	11	2	42				9478.83	3.9768	7.83	11.31	117	33.2	29.4	10.4	15.1	22.9	4.01	3.31	0.08	0.29	0.02	0.13
2017	4	48	2	42.1				532546	5.72636	5.14	10.41	114	31.4	30.1	11	16.6	25	3.32	1.46	0.19	0.07	0.01	0.08
2017	4	93	2	40.4				0	0	10.53	10.88	118	32.5	29.9	10.9	18.2	23.9	3.86	6.03	0.27	0.19	0.09	0.09
2017	4	149	2	41.8				259486	5.41412	5.81	10.15	107	31	30.5	10.5	17.2	20.5	2.75	2.6	0.27	0.11	0.01	0.07
2017	4	263	2	41.8				352523	5.54719	4.67	10.89	117	33.3	30.6	10.8	17.8	21.7	2.94	1.45	0.06	0.11	0.02	0.1
2017	5	11	2	41.4
2017	5	48	2	41.6
2017	5	93	2	41.6
2017	5	149	2	41.5
2017	5	263	2	42
2017	6	11	2	41.2				258685	5.41277	5.16	10.73	113	30	28	10.5	15.2	24.1	2.7	1.92	0.2	0.09	0.02	0.23
2017	6	48	2	41.7				711134	5.85195	5.02	11.94	129	34.5	28.9	10.8	16.9	29.2	3.37	1.12	0.09	0.08	0	0.35
2017	6	93	2	41.7				572353	5.75766	6.43	11	119	32.5	29.5	10.9	17.9	23.3	3.61	2.27	0.1	0.09	0.01	0.35
2017	6	149	2	40.9				420646	5.62392	6.61	11.28	119	32.6	28.9	10.5	17.4	23.3	3.55	2.3	0.41	0.11	0.01	0.23
2017	6	263	2	41.4				385851	5.58642	3.82	10.62	114	31.3	29.4	10.8	17.8	23.6	1.97	1.09	0.47	0.09	0.02	0.17
2017	7	11	2	41.1
2017	7	48	2	41.5
2017	7	93	2	40.7
2017	7	149	2	40.2
2017	7	263	2	41.5
2017	8	11	2	41.2				122342	5.08758	6.41	11.02	113	31.9	28.9	10.3	15.5	24.7	2.08	3.59	0.21	0.19	0.05	0.3
2017	8	48	2	41.1				339527	5.53088	8.8	11.75	123	34.6	29.5	10.5	16.9	30.6	5.87	1.96	0.43	0.08	0.03	0.44
2017	8	93	2	40.7				201708	5.30473	6.98	11.16	119	33.5	30	10.6	17.4	22.9	3.29	2.83	0.3	0.19	0.04	0.33
2017	8	149	2	39.3				130317	5.115	6.27	9.84	102	29	29.4	10.4	17.6	23.3	1.98	3.3	0.66	0.1	0.05	0.19
2017	8	263	2	40.5				87660.1	4.94281	4.08	9.84	105	29.7	30.1	10.7	17.4	23.4	1.83	1.74	0.33	0.09	0.02	0.07
2017	9	11	2	40.3
2017	9	48	2	41.7
2017	9	93	2	41.3
2017	9	149	2	41
2017	9	263	2	40.6
2017	10	11	2	40.9				16796.5	4.22524	5.39	10.67	108	30.6	28.7	10.1	15.7	24.9	0.88	3.56	0.7	0.09	0.03	0.12
2017	10	48	2	40.8				709350	5.85086	10.6	11.74	126	34.8	29.6	10.7	16.7	30.2	7.28	2.82	0.33	0.07	0.03	0.07
2017	10	93	2	41.8				92947.8	4.96824	7.44	10.67	115	32	30	10.8	17	22.1	2.46	4.29	0.38	0.12	0.04	0.15
2017	10	149	2	39.9				6817.21	3.83367	7.8	9.9	100	28.8	29.1	10.1	17.6	23.4	0.96	5.88	0.74	0.05	0.09	0.08
2017	10	263	2	40.3				5430.95	3.73496	4.7	10.2	109	30.6	30	10.7	17.2	23.3	0.69	3.4	0.43	0.04	0.06	0.07
2017	11	11	2	40
2017	11	48	2	40.6
2017	11	93	2	40.8
2017	11	149	2	40.1
2017	11	263	2	39.7
2017	12	11	2	40.2
2017	12	48	2	40.4
2017	12	93	2	40.4
2017	12	149	2	39.7
2017	12	263	2	39.7
2017	13	11	2	40.4
2017	13	48	2	40.3
2017	13	93	2	40.9
2017	13	149	2	40.1
2017	13	263	2	39.8
2017	14	11	2	40.7				19161.2	4.28244	5.35	10.92	113	31.5	28.9	10.3	15.6	23.3	1.56	2.9	0.65	0.07	0.05	0.12
2017	14	48	2	40.5				5304.57	3.72473	13.73	12.94	143	39.6	30.6	11.1	17.3	29.7	8.33	3.36	1.45	0.08	0.07	0.45
2017	14	93	2	40.5				2121.87	3.32692	4.79	10.52	113	32	30.4	10.7	16.9	21.9	1.01	3.45	0.23	0.05	0.01	0.02
2017	14	149	2	39.3				143.45	2.15972	6.8	10.38	106	30.3	29.2	10.3	17.6	22.6	0.63	3.94	1.85	0.03	0.04	0.31
2017	14	263	2	39.9				5496.94	3.7402	3.97	10.46	111	32.3	30.9	10.6	17.7	22.7	0.87	2.53	0.49	0.04	0.02	0.02
2017	15	11	2	41.6
2017	15	48	2	41.2
2017	15	93	2	40.3
2017	15	149	2	39.3
2017	15	263	2	39.7
2017	16	11	2	40.3
2017	16	48	2	41
2017	16	93	2	39.9
2017	16	149	2	38.9
2017	16	263	2	39.5
2017	17	11	2	39.3
2017	17	48	2	40.8
2017	17	93	2	39.8
2017	17	149	2	39.2
2017	17	263	2	39.5
2017	18	11	2	39.7				18.4278	1.28842	4.96	10.14	104	29.4	29	10.3	15.5	23.1	0.44	3.91	0.45	0.1	0.03	0.02
2017	18	48	2						0
2017	18	93	2	39.6				11149.3	4.04729	7.67	10.29	111	31.3	30.4	10.8	17.2	24.4	1.89	4.71	0.79	0.19	0.04	0.05
2017	18	149	2	38.8				2024.33	3.3065	8.34	9.49	97	28.9	30.5	10.3	17.6	21.1	2.09	5.58	0.51	0.11	0.04	0.02
2017	18	263	2	39				0.433673	0.15645	5.35	9.9	108	31.4	31.7	10.9	17.6	22.6	1.49	3.43	0.32	0.08	0.02	0.01
2017	19	11	2	39.6
2017	19	48	2
2017	19	93	2	40
2017	19	149	2	39.2
2017	19	263	2	39.1
2017	20	11	2	39.6
2017	20	48	2
2017	20	93	2	39.2
2017	20	149	2	39.1
2017	20	263	2	39.1
2017	21	11	2	39.4				146.459	2.16867	6.05	9.81	99	28.9	29.5	10.1	15.9	23.1	1.08	4.18	0.62	0.05	0.09	0.02
2017	21	48	2						0
2017	21	93	2	39				1629.37	3.21229	6.64	10.47	113	32.5	31.1	10.8	16.8	21.7	0.94	4.54	0.94	0.09	0.03	0.1
2017	21	149	2	39.3				0.695875	0.229394	9.29	9.93	101	30.1	30.3	10.2	19.4	23.3	2.46	4.09	2.45	0.09	0.05	0.16
2017	21	263	2	39.2				0.285447	0.109054	7.91	10.16	108	32.5	32	10.7	18	23.1	2.62	2.92	2.14	0.11	0.03	0.09
2017	22	11	2	39.2
2017	22	48	2
2017	22	93	2	39.3
2017	22	149	2	38.8
2017	22	263	2	39.3
2017	23	11	2	39.4						5.85	9.93	101	29	29.2	10.1	18.1	24.3	1.44	3.86	0.33	0.06	0.09	0.08
2017	23	48	2
2017	23	93	2	39.2						8.55	10.38	112	32.3	31.1	10.7	16.9	21.8	1.84	6.14	0.27	0.09	0.06	0.14
2017	23	149	2	39.2						9.75	10.5	109	32	30.5	10.4	20.1	23.5	2.76	6.53	0.17	0.08	0.05	0.16
2017	23	263	2	39.5						9.53	10.9	117	34.9	32	10.8	18.3	22.8	4.36	4.69	0.31	0.12	0.03	0.02
2017	24	11	2	39.7
2017	24	48	2
2017	24	93	2	39.4
2017	24	149	2	39
2017	24	263	2	39.4
2017	25	11	2	39.2						4.95	9.58	101	28.2	29.4	10.5	18.8	24.6	0.7	3.8	0.29	0.11	0.03	0.02
2017	25	48	2
2017	25	93	2	39.3						10.72	9.79	108	30	30.6	11.1	17.4	23.7	3.14	6.93	0.08	0.41	0.06	0.1
2017	25	149	2	39.1						11.36	9.65	105	30.4	31.6	10.9	19.5	21	3.74	7.01	0.39	0.13	0.07	0.02
2017	25	263	2	39.1						7.13	9.42	105	30.3	32.2	11.2	18.2	22.2	2.29	4.59	0.02	0.15	0.02	0.05
2017	26	11	2	39.2
2017	26	48	2
2017	26	93	2	39.2
2017	26	149	2	39
2017	26	263	2	39.1
2017	27	11	2	39.7						6.98	10.13	104	29.4	29.1	10.3	19.1	26.3	2.39	3.97	0.45	0.13	0.02	0.01
2017	27	48	2
2017	27	93	2	39.6						7.56	10.74	114	33.1	30.8	10.6	17.1	22.7	1.91	4.81	0.36	0.41	0.05	0.01
2017	27	149	2	39						12.28	10.88	110	32.8	30.1	10.1	20	23.7	3.31	8.44	0.31	0.09	0.07	0.05
2017	27	263	2	38.9						7.07	10.43	114	32.9	31.6	10.9	18.4	23.4	2.39	2.87	1.51	0.2	0.03	0.08
2017	28	11	2	39.3
2017	28	48	2
2017	28	93	2	39.2
2017	28	149	2	39.1
2017	28	263	2	39.4
2017	29	11	2	39.4						6.88	9.17	93	26.6	29	10.2	18.7	25.5	2.42	3.95	0.32	0.14	0.04	0.01
2017	29	48	2
2017	29	93	2	39.5						9.49	10.43	111	32.2	30.9	10.46	16.9	21.9	3.63	5.14	0.23	0.32	0.08	0.09
2017	29	149	2	39.1						10.57	10.26	105	31.1	30.3	10.3	20	23.3	2.47	7.6	0.16	0.11	0.06	0.18
2017	29	263	2	39.4						7.48	9.89	103	31.4	31.7	10.5	18.2	22.7	2.77	3.06	1.46	0.09	0.04	0.06
2017	30	11	2	39.8
2017	30	48	2
2017	30	93	2	40.3
2017	30	149	2	39.3
2017	30	263	2	39.9
2017	31	11	2	39.5						6.8	9.14	94	26.7	29.3	10.2	19.8	25.9	1.92	4.41	0.2	0.11	0.08	0.08
2017	31	48	2
2017	31	93	2	39.5						9.66	10.44	109	32.3	30.9	10.5	17	21.4	2.24	6.5	0.54	0.18	0.12	0.08
2017	31	149	2	39						9.32	10.21	105	31.1	30.4	10.3	19.9	23.5	2.13	6.54	0.51	0.1	0.04	0.01
2017	31	263	2	40.1						8.78	9.42	100	29.8	31.7	10.6	18.4	22.7	4.22	2.88	1.45	0.11	0.02	0.1
2017	32	11	2	39.5
2017	32	48	2
2017	32	93	2	39.4
2017	32	149	2	38.8
2017	32	263	2	39.8
2017	33	11	2	39.5
2017	33	48	2
2017	33	93	2	39.4
2017	33	149	2	39.1
2017	33	263	2	39.9
2017	34	11	2	39.5
2017	34	48	2
2017	34	93	2	39
2017	34	149	2	39.3
2017	34	263	2	39.6
2017	35	11	2	39.6						6.66	9.33	98	28.5	30.5	10.5	22.4	28.2	1.58	3.35	1.39	0.13	0.08	0.13
2017	35	48	2
2017	35	93	2	39.3						9.11	10.16	106	31.4	30.9	10.5	17.1	22.8	2.74	5.39	0.18	0.62	0.06	0.13
2017	35	149	2	39.1						11.1	10.33	106	31.6	30.6	10.2	19.8	23.7	2.69	7.41	0.73	0.13	0.11	0.03
2017	35	263	2	39.6						6.16	9.28	99	29.6	32	10.7	18	23.1	2.08	3.59	0.3	0.1	0.02	0.07
2017	36	11	2	39.6
2017	36	48	2
2017	36	93	2	39.4
2017	36	149	2	39.1
2017	36	263	2	39.6
2017	37	11	2	39.6
2017	37	48	2
2017	37	93	2	39.2
2017	37	149	2	39
2017	37	263	2	39.6
2017	38	11	2	40.4
2017	38	48	2
2017	38	93	2	39.2
2017	38	149	2	39
2017	38	263	2	39.5
2017	39	11	2	39.3						7.6	9.29	96	28	30.1	10.4	22.5	29.3	3.69	3.53	0.17	0.11	0.06	0.05
2017	39	48	2
2017	39	93	2	39.2						10.11	9.74	102	30.1	30.9	10.4	17.3	23.1	2.92	5.94	0.34	0.74	0.09	0.08
2017	39	149	2	39.1						11.04	10.18	104	31.1	30.5	10.2	19.8	24	3.24	7.29	0.15	0.09	0.09	0.17
2017	39	263	2	39.4						5.6	9.47	101	30.6	32.3	10.7	18.1	23.5	2.14	3.2	0.08	0.07	0.02	0.09
2017	40	11	2	39.5
2017	40	48	2
2017	40	93	2	39.1
2017	40	149	2	39
2017	40	263	2	39.2
2017	41	11	2	38.7
2017	41	48	2
2017	41	93	2	39.4
2017	41	149	2	38.9
2017	41	263	2	39.1
2017	42	11	2	39.7						7.68	10.06	106	31	30.8	10.6	22	27.9	2.89	4.22	0.26	0.16	0.07	0.07
2017	42	48	2
2017	42	93	2	39.2						13.08	9.67	102	29.6	30.7	10.6	17.7	23.5	4.88	7.13	0.41	0.47	0.16	0.04
2017	42	149	2	38.9						12.79	10.98	112	33.4	30.4	10.2	19.3	23.3	4.69	7.05	0.83	0.12	0.07	0.04
2017	42	263	2	39.7						8.43	9.8	106	31.3	32	10.8	17.9	23.2	4.67	3.4	0.14	0.09	0.03	0.08
2017	0	24	3	39.4				0	0	13.56	11.27	118	33	29.3	10.5	17.1	22.7	4.8	7.57	0.82	0.26	0.09	0.01
2017	0	55	3	39.7				0	0	10.65	10.57	109	29.7	28.1	10.3	17.3	23.7	3.91	5.81	0.61	0.25	0.05	0.03
2017	0	108	3	39.4				0	0	9	10.68	110	31	29	10.3	17.2	23.8	1.96	6.2	0.57	0.13	0.07	0.07
2017	0	176	3	39.3				0	0	5.76	10.3	104	28.4	27.6	10.1	18.8	27.7	1.42	4.03	0.18	0.1	0.02	0
2017	0	504	3	39.4				0	0	9.6	10.16	109	30.9	30.4	10.7	17.1	22.2	2.11	5.55	1.62	0.2	0.04	0.07
2017	1	24	3	39.3
2017	1	55	3	39.4
2017	1	108	3	39.2
2017	1	176	3	39.2
2017	1	504	3	39.4
2017	2	24	3	39.3				117.261	2.07284	13.4	10.41	108	30.5	29.3	10.4	17.2	23.2	5.04	7.3	0.46	0.25	0.11	0.24
2017	2	55	3	39.2				60.1918	1.78669	11.21	10.88	110	30.8	28.3	10.1	17.2	24.3	4.46	5.88	0.47	0.25	0.05	0.09
2017	2	108	3	38.9				124.386	2.09825	9.23	10.58	107	30.7	29	10.1	17.2	24.6	2.5	5.99	0.47	0.12	0.08	0.07
2017	2	176	3	39.2				80.9613	1.91361	6.63	10.57	107	29.4	27.8	10.2	18.7	28	2.36	3.91	0.15	0.12	0.03	0.04
2017	2	504	3	39.5				112.051	2.05328	9.44	10.01	107	30.4	30.4	10.7	17.1	22.3	2.95	5.88	0.2	0.24	0.04	0.14
2017	3	24	3	40.2
2017	3	55	3	40.6
2017	3	108	3	40.9
2017	3	176	3	40.8
2017	3	504	3	41.3
2017	4	24	3	41.8				388781	5.58971	8	10.23	107	30.1	29.4	10.5	16.8	21.2	4.45	3.02	0.11	0.2	0.02	0.21
2017	4	55	3	41.8				243415	5.38635	3.72	10.15	105	29.4	29	10.4	17.2	22.8	1.96	1.37	0.2	0.13	0.01	0.05
2017	4	108	3	42.1				179505	5.25408	4.13	10.63	110	31.2	29.4	10.4	17.1	23.8	2.11	1.67	0.19	0.09	0.01	0.05
2017	4	176	3	41.9				135807	5.13293	6.59	10.07	101	27.6	27.4	10	18.1	25.8	2.33	1.05	0.11	0.07	0.01	0.02
2017	4	504	3	42.4				287052	5.45796	5.05	9.8	105	30.6	31.2	10.8	16.7	19.3	2.83	1.71	0.06	0.26	0.01	0.18
2017	5	24	3	41.4
2017	5	55	3	41.3
2017	5	108	3	41.6
2017	5	176	3	41.7
2017	5	504	3	41.5
2017	6	24	3	40.8				264964	5.42319	9.75	10.72	112	30.3	28.3	10.4	17.8	25	4.74	3.83	0.66	0.13	0.02	0.37
2017	6	55	3	41				187807	5.27371	5.9	11.81	122	32.4	27.4	10.3	18.1	29.3	3.74	1.27	0.4	0.08	0	0.4
2017	6	108	3	41.4				280370	5.44773	4.68	11.66	120	32.7	28	10.3	17.7	28.6	2.96	0.81	0.75	0.07	0	0.08
2017	6	176	3	41.2				172047	5.23565	3.96	11.09	113	29.7	26.8	10.2	18.4	30.1	2.49	1.03	0.29	0.07	0	0.08
2017	6	504	3	41.5				366978	5.56464	6.09	10.05	108	29.7	29.6	10.7	17.2	23	3.46	1.2	0.74	0.16	0.02	0.51
2017	7	24	3	40.8
2017	7	55	3	40.8
2017	7	108	3	40.5
2017	7	176	3	41
2017	7	504	3	40.9
2017	8	24	3	40.4				203989	5.30961	7.3	9.99	105	28.9	28.9	10.5	17.5	24.3	3.16	2.71	1.17	0.12	0.04	0.1
2017	8	55	3	41.3				154458	5.18881	4.33	9.73	99	27.3	28.1	10.2	18.3	29.5	2.41	1.18	0.58	0.08	0.02	0.08
2017	8	108	3	40.4				101495	5.00645	5.47	10.43	108	30.1	28.9	10.4	17.8	28.5	1.99	2.29	0.69	0.06	0.04	0.4
2017	8	176	3	41.4				90545.6	4.95687	3.68	9.19	93	25.2	27.4	10.1	18.2	28.7	1.79	1.39	0.38	0.07	0.02	0.03
2017	8	504	3	41				82023.7	4.91394	4.43	9.57	103	28.8	30.1	10.7	17.2	22	1.01	2.31	0.54	0.1	0.02	0.44
2017	9	24	3	40.1
2017	9	55	3	40.9
2017	9	108	3	40.7
2017	9	176	3	40.4
2017	9	504	3	40.9
2017	10	24	3	40.3				2756.34	3.44049	9.02	10.84	113	31.4	29.9	10.4	17.4	24.3	0.83	6.99	0.86	0.04	0.09	0.22
2017	10	55	3	40.9				41472.7	4.61777	5.25	9.84	100	27.8	28.2	10.2	18.4	29.3	1.3	2.98	0.64	0.05	0.06	0.23
2017	10	108	3	40				5035.95	3.70217	6.17	10.27	106	29.8	29	10.3	17.9	28.6	0.5	4.97	0.3	0.03	0.07	0.3
2017	10	176	3	40.5				6190.3	3.79178	3.53	9.24	93	25.2	27.3	10.1	18.1	28.5	0.36	2.31	0.65	0.03	0.03	0.16
2017	10	504	3	40.6				8502.69	3.92961	6	10.11	106	30.2	29.8	10.5	17.3	23.3	0.43	4.05	1	0.06	0.08	0.38
2017	11	24	3	40.4
2017	11	55	3	40.1
2017	11	108	3	39.9
2017	11	176	3	41.1
2017	11	504	3	40
2017	12	24	3	40.1
2017	12	55	3	41
2017	12	108	3	39.6
2017	12	176	3	39.9
2017	12	504	3	39.4
2017	13	24	3	40.9
2017	13	55	3	40.2
2017	13	108	3	39.5
2017	13	176	3	40.3
2017	13	504	3	39.3
2017	14	24	3	39.9				130.355	2.11845	7.14	10.95	114	31.8	29.1	10.4	17.5	23.7	1.39	4.19	1.16	0.06	0.04	0.3
2017	14	55	3	40.3				677.467	2.83153	4.61	9.01	93	25.9	28.8	10.3	18.8	28.1	1.37	2.04	0.94	0.05	0.01	0.2
2017	14	108	3	39.6				1426.47	3.15457	5.29	10.1	106	29.7	29.4	10.5	18.5	27.3	0.37	2.61	1.97	0.08	0.02	0.25
2017	14	176	3	39.8				257.006	2.41163	4.8	10.06	103	28.2	28	10.2	18.9	28.1	0.48	2.77	1.29	0.05	0.03	0.18
2017	14	504	3	39.9				10004	4.00022	6.31	10.33	110	31.8	30.8	10.7	17.8	22.3	1.92	2.64	1.53	0.09	0.01	0.12
2017	15	24	3	39.6
2017	15	55	3	39.9
2017	15	108	3	39.4
2017	15	176	3	39.7
2017	15	504	3	39.5
2017	16	24	3	40.2
2017	16	55	3	40.7
2017	16	108	3	39.1
2017	16	176	3	40.5
2017	16	504	3	39.2
2017	17	24	3	39.2
2017	17	55	3	39.4
2017	17	108	3	39.2
2017	17	176	3	39.3
2017	17	504	3	39.3
2017	18	24	3	39.5				78.3528	1.89956	8.25	9.83	102	29.5	30	10.4	17.2	21.6	2.23	4.85	1	0.1	0.05	0.03
2017	18	55	3	39.5				209.763	2.32379	4.8	9.3	97	27.6	29.7	10.4	18.2	26.1	1.23	2.91	0.52	0.1	0.02	0.01
2017	18	108	3	38.9				3186.91	3.50351	7.27	9.79	101	29.4	30.1	10.3	18.4	26.1	1.58	5.01	0.49	0.15	0.04	0.01
2017	18	176	3	38.6				2.15128	0.498486	3.72	9.49	97	27.5	29	10.2	18.5	26.6	0.39	2.29	0.88	0.06	0.03	0.07
2017	18	504	3	39				0	0	7.42	9.06	97	28.8	31.8	10.7	17.9	20.6	2.35	3.04	1.7	0.2	0.02	0.11
2017	19	24	3	39
2017	19	55	3	39.4
2017	19	108	3	38.7
2017	19	176	3	38.9
2017	19	504	3	39
2017	20	24	3	39.4
2017	20	55	3	39.6
2017	20	108	3	39.1
2017	20	176	3	39
2017	20	504	3	38.9
2017	21	24	3	39.2	0	0	0	2.99546	0.601567	9.34	9.88	101	29.4	29.8	10.2	17.7	23.2	3.23	4.87	1.06	0.11	0.04	0.04
2017	21	55	3	39.2	0	0	0	140.755	2.15154	5.36	9.82	101	28.7	29.2	10.3	18.7	27.3	0.9	3.83	0.3	0.09	0.03	0.2
2017	21	108	3	38.9	0	0	0	0	0	6.26	10.17	105	30.4	29.9	10.3	18.7	26.9	0.9	4.71	0.55	0.05	0.03	0.02
2017	21	176	3	39.1	0	0	0	2.6227	0.559033	5.25	9.97	101	28.9	29	10.1	18.9	28	1.61	3.41	0.05	0.08	0.02	0.09
2017	21	504	3	39.1	0	0	0	0	0	9.51	9.19	96	28.6	31.1	10.5	19.1	23.2	2.57	5.96	0.62	0.31	0.04	0.01
2017	22	24	3	39.4
2017	22	55	3	39
2017	22	108	3	39
2017	22	176	3	39.1
2017	22	504	3	39.4
2017	23	24	3	39	0	0	0			8.98	9.93	104	29.5	29.7	10.5	18.1	23.3	2.9	3.72	2.05	0.1	0.05	0.17
2017	23	55	3	39.1	31.01	0	0			4.58	9.71	100	28.5	29.3	10.3	18.9	27.1	1.35	2.03	1.01	0.07	0.02	0.11
2017	23	108	3	39.8	31.89	0	0			7.96	10.3	107	30.6	29.7	10.4	18.7	27.1	2.21	5.34	0.26	0.08	0.04	0.02
2017	23	176	3	39.2	0	0	0			5.23	10.32	107	29.8	28.9	10.3	19.1	28.3	1.42	3.57	0.06	0.05	0.03	0.1
2017	23	504	3	39.3	0	0	0			10.63	9.44	101	29.7	31.5	10.7	19.9	24.6	3.54	6.31	0.19	0.36	0.06	0.17
2017	24	24	3	39.3
2017	24	55	3	39.5
2017	24	108	3	39.2
2017	24	176	3	39.4
2017	24	504	3	39.2
2017	25	24	3	39.4	0	0	0			11.21	9.66	102	29.8	30.9	10.5	18.2	21.2	4.67	3.8	2.29	0.23	0.04	0.18
2017	25	55	3	39.3	0	0	0			6.15	9.28	98	28.2	30.4	10.6	18.2	23.2	2.71	2.97	0.31	0.14	0.02	0.01
2017	25	108	3	39.2	35.16	0	0			8.05	9.58	102	29.5	30.8	10.7	18.5	25.1	2.41	5.1	0.31	0.18	0.04	0.01
2017	25	176	3	39	0	0	0			5.81	9.51	100	27.9	29.3	10.6	19	26.3	1.79	3.7	0.08	0.09	0.04	0.1
2017	25	504	3	39.5	0	0	0			12.36	8.72	97	28.5	32.7	11.1	19.3	21.2	4.79	6.73	0.19	0.5	0.05	0.11
2017	26	24	3	40.1
2017	26	55	3	39.5
2017	26	108	3	39.2
2017	26	176	3	39.5
2017	26	504	3	39.5
2017	27	24	3	39.6	0	0	30			10.43	10.35	106	30.5	29.5	10.2	18.7	24.5	3.73	4.13	2.11	0.22	0.05	0.19
2017	27	55	3	39.3	0	0	0			7.09	9.64	100	27.8	28.8	10.3	18.6	26.5	2.99	3.55	0.19	0.14	0.03	0.2
2017	27	108	3	38.8	0	1	10			8.79	9.77	101	28.8	29.5	10.3	18.7	26.4	2.84	5.32	0.48	0.09	0.04	0.02
2017	27	176	3	39.5	0	1	40			6.87	10.34	107	29.7	28.7	10.3	19.5	28.6	2.66	3.84	0.12	0.06	0.04	0.14
2017	27	504	3	39.2	0	1	40			11.57	9.77	105	30.7	31.4	10.8	20	24.2	3.68	7.08	0.35	0.35	0.08	0.04
2017	28	24	3	39.3
2017	28	55	3	39.4
2017	28	108	3	39.2
2017	28	176	3	39.8
2017	28	504	3	39.3
2017	29	24	3	39.3	0	1	80			9.87	9.58	99	28.3	29.6	10.3	18.6	23.9	3.51	5.34	0.81	0.15	0.05	0.01
2017	29	55	3	39.1	0	1	0			8.49	9.39	94	27	28.8	10	18.4	26	3.47	3.43	1.23	0.17	0.03	0.16
2017	29	108	3	39.1	0	1	40			8.73	9.54	96	28.4	29.7	10.1	18.6	26.5	2.13	6.16	0.21	0.06	0.06	0.11
2017	29	176	3	39.6	0	1	60			6.12	9.47	95	27.3	28.8	10.1	19.4	28.5	1.7	3.08	1.11	0.08	0.03	0.13
2017	29	504	3	39.1	0	1	60			9.45	9.53	101	30	31.5	10.6	19.8	24.6	2.59	6.22	0.19	0.27	0.05	0.13
2017	30	24	3	39.3
2017	30	55	3	39.3
2017	30	108	3	38.9
2017	30	176	3	39.2
2017	30	504	3	39.2
2017	31	24	3	39.5	0	1	480			8.04	9.53	99	28.6	30	10.4	18.7	23.6	2.38	4.85	0.6	0.14	0.05	0.02
2017	31	55	3	39.4	0	1	320			9.26	9.59	96	27.8	29	10	18.2	25.5	3.8	4.83	0.21	0.21	0.04	0.16
2017	31	108	3	39.1	0	1	80			7.95	9.7	98	28.7	29.6	10.2	18.4	26.3	1.69	5.74	0.26	0.13	0.04	0.09
2017	31	176	3	39.7	0	1	160			6.78	9.46	96	27.2	28.7	10.1	19.1	27.6	2.42	3.83	0.36	0.12	0.02	0.02
2017	31	504	3	39.4	0	1	80			9.09	9.67	105	30.3	31.3	10.9	19.7	24.9	3.03	5.19	0.52	0.29	0.05	0.02
2017	32	24	3	39.8
2017	32	55	3	39.3
2017	32	108	3	39.2
2017	32	176	3	39.5
2017	32	504	3	39.4
2017	33	24	3	39.4
2017	33	55	3	39.3
2017	33	108	3	39.4
2017	33	176	3	39.4
2017	33	504	3	39.4
2017	34	24	3	39.6
2017	34	55	3	39.4
2017	34	108	3	39.4
2017	34	176	3	39.9
2017	34	504	3	39.2
2017	35	24	3	39.6	0	1	80			9.1	10.1	105	30.8	30.5	10.4	19.3	24.3	3.44	4.67	0.79	0.13	0.04	0.03
2017	35	55	3	39.4	0	1	160			7.72	9.85	101	28.9	29.4	10.2	18.4	25.6	3.08	3.4	0.88	0.2	0.04	0.12
2017	35	108	3	39.6	0	1	40			7.24	9.69	100	29.4	30.3	10.3	19.2	26.8	2.37	4.28	0.24	0.09	0.05	0.19
2017	35	176	3	39.5	0	1	40			5.26	9.54	96	27.5	28.9	10.1	18.9	27.2	1.56	3.41	0.08	0.09	0.03	0.09
2017	35	504	3	39.2	0	1	20			9.94	9.81	105	31.1	31.7	10.7	19.6	24	2.95	6.1	0.2	0.43	0.05	0.2
2017	36	24	3	39.4
2017	36	55	3	39.9
2017	36	108	3	39.5
2017	36	176	3	39.8
2017	36	504	3	39.4
2017	37	24	3	39.3
2017	37	55	3	39.6
2017	37	108	3	39.1
2017	37	176	3	39.8
2017	37	504	3	39.4
2017	38	24	3	39.2
2017	38	55	3	39.6
2017	38	108	3	39.4
2017	38	176	3	39.5
2017	38	504	3	39.7
2017	39	24	3	39.5	0	1	80			9.06	10.1	105	30.7	30.4	10.4	19.4	24.5	3.43	3.78	1.52	0.12	0.06	0.15
2017	39	55	3	39.7	0	1	120			4.98	10.54	110	31.2	29.6	10.5	18.5	25.2	2.1	2.33	0.4	0.09	0.01	0.04
2017	39	108	3	39.1	0	1	30			6.52	9.66	101	29.4	30.4	10.5	19.2	27.1	1.46	4.5	0.44	0.08	0.03	0.01
2017	39	176	3	39.8	0	1	60			6.17	9.55	95	27.7	29.1	10	18.7	27.2	2.18	3.66	0.13	0.07	0.04	0.08
2017	39	504	3	39.7	0	1	20			9.27	9.73	105	31	31.9	10.8	19.4	24.1	3.4	5.27	0.22	0.2	0.04	0.13
2017	40	24	3	39.2
2017	40	55	3	39.2
2017	40	108	3	39.2
2017	40	176	3	39.3
2017	40	504	3	39.3
2017	41	24	3	39.4
2017	41	55	3	39.1
2017	41	108	3	38.9
2017	41	176	3	39.6
2017	41	504	3	39.3
2017	42	24	3	39.3	0	1	20			8.21	10.35	109	31.8	30.7	10.6	19.4	24.1	2.76	4.55	0.57	0.12	0.05	0.16
2017	42	55	3	39.3	0	1	0			6.77	9.88	103	28.9	29.2	10.4	18.1	24.6	2.69	2.79	0.99	0.14	0.04	0.13
2017	42	108	3	39.3	0	1	20			6.99	9.97	105	30.1	30.2	10.5	18.7	26	2.62	3.97	0.18	0.07	0.04	0.1
2017	42	176	3	39.5	0	0	0			6.97	9.68	100	27.8	28.7	10.3	18.4	27.1	3.17	3.43	0.14	0.09	0.03	0.1
2017	42	504	3	39.3	0	1	40			7.99	10.49	117	33.5	32	11.1	19.2	23.7	2.06	4.91	0.63	0.31	0.04	0.03
2017	0	15	4	39.3	0	0	0	0	0	13.42	11.23	112	31.9	28.4	9.9	17.2	23.7	3.47	9.01	0.59	0.14	0.09	0.11
2017	0	61	4	39.5	0	0	0	0	0	10.01	11.32	118	35.9	31.5	10.3	17.9	21.2	3.08	6.09	0.45	0.18	0.09	0.12
2017	0	118	4	39.4	0	0	0	0	0	15.46	11.23	112	32.8	29.2	10	17.5	22.8	4.12	8.5	1.99	0.6	0.17	0.09
2017	0	252	4	39.1	0	0	0	0	0	9.74	13.48	128	37	27.5	9.5	18.6	24.9	4.15	4.72	0.43	0.19	0.09	0.16
2017	0	510	4	39.1	0	0	0	0	0	7.86	10.25	101	27.7	27	9.9	18.9	28.6	2.41	4.52	0.53	0.26	0.06	0.07
2017	1	15	4	39.2
2017	1	61	4	39.2
2017	1	118	4	38.8
2017	1	252	4	39.4
2017	1	510	4	39.3
2017	2	15	4	39.1	0	0	0	0	0	12.71	11.22	111	32.1	28.6	9.9	17.2	23.9	3.58	8.53	0.2	0.14	0.1	0.17
2017	2	61	4	39.2	0	0	0	0	0	9.64	10.9	114	34.3	31.4	10.4	17.9	21.4	3.14	5.77	0.32	0.23	0.09	0.1
2017	2	118	4	38.5	0	0	0	0	0	14.34	11.56	116	33.9	29.3	10	17.9	24	3.11	9.01	1.32	0.56	0.19	0.16
2017	2	252	4	39.4	0	0	0	0	0	13.85	13.83	132	37.9	27.4	9.5	18.3	25.2	4.99	7.79	0.78	0.15	0.1	0.05
2017	2	510	4	39.5	0	0	0	0	0	7.51	10.56	106	28.8	27.3	10	18.6	28.6	2.73	4.18	0.36	0.19	0.04	0.01
2017	3	15	4	38.6
2017	3	61	4	38.3
2017	3	118	4	38.7
2017	3	252	4	38.2
2017	3	510	4	39.1
2017	4	15	4	38.8	0	0	0	0	0	12.68	10.66	108	31.7	29.7	10.1	16.9	20.3	3.72	8.38	0.19	0.16	0.07	0.15
2017	4	61	4	39	0	0	0	0	0	9	10.71	114	34.5	32.2	10.7	17.5	19.5	2.68	5.76	0.27	0.16	0.06	0.07
2017	4	118	4	38.6	0	0	0	0	0	13.6	10.19	106	30.1	29.6	10.4	17.4	22	2.77	9.94	0.18	0.58	0.1	0.03
2017	4	252	4	39.4	0	0	0	0	0	16.32	12.6	123	36.6	29	9.7	17.5	20.8	8.73	6.45	0.86	0.16	0.1	0.03
2017	4	510	4	39.1	0	0	0	0	0	7.23	10.27	105	27.8	27.1	10.2	17.8	23.6	3.24	3.34	0.36	0.21	0.05	0.03
2017	5	15	4	38.9
2017	5	61	4	39.3
2017	5	118	4	39.1
2017	5	252	4	39.4
2017	5	510	4	39.3
2017	6	15	4	38.9	0	0	0	0	0	12.93	10.15	102	28.6	28.2	10.1	17.7	24.5	4.05	8.23	0.23	0.13	0.11	0.19
2017	6	61	4	39.3	0	0	0	0	0	8.64	10	105	30.9	30.9	10.5	18.1	22.1	2.23	5.57	0.61	0.13	0.08	0.02
2017	6	118	4	39.2	0	0	0	0	0	13.97	11.11	112	31.7	28.5	10.1	17.8	24.6	3.86	8.48	1	0.34	0.11	0.17
2017	6	252	4	39.5	0	0	0	0	0	15.1	13.07	126	35.3	27	9.6	18.1	26.2	7.06	6.52	1.24	0.11	0.11	0.05
2017	6	510	4	40.3	0	0	0	0	0	7.84	10.15	101	27	26.6	10	18.6	28.9	3.45	3.9	0.15	0.16	0.05	0.12
2017	7	15	4	38.8
2017	7	61	4	39
2017	7	118	4	38.7
2017	7	252	4	39.7
2017	7	510	4	39.4
2017	8	15	4	39.4	0	0	0	0	0	10.23	10.39	106	29.7	28.5	10.2	18	24.4	4.24	5.34	0.37	0.14	0.06	0.07
2017	8	61	4	39.4	0	0	0	0	0	9.88	10.3	108	32.5	31.5	10.5	17.8	21.5	3.58	5.52	0.43	0.18	0.06	0.11
2017	8	118	4	39.2	0	0	0	0	0	14.3	10.5	107	30.3	28.9	10.2	18	24.4	5.06	8.06	0.67	0.36	0.12	0.03
2017	8	252	4	39.8	0	0	0	0	0	17.55	12.92	125	35.1	27.1	9.7	17.9	25.9	11.41	4.67	1.23	0.08	0.1	0.06
2017	8	510	4	39.8	0	0	0	0	0	7.13	9.82	100	26.7	27.2	10.2	18.5	28.6	2.81	3.44	0.6	0.13	0.03	0.12
2017	9	15	4	38.9
2017	9	61	4	39.1
2017	9	118	4	38.6
2017	9	252	4	39.9
2017	9	510	4	39.4
2017	10	15	4	39.2	0	0	0	0	0	12.97	11.04	113	31.9	28.9	10.3	18.8	25	3.63	8.32	0.81	0.1	0.09	0.01
2017	10	61	4	39	0	0	0	0	0	9.38	10.8	108	31.9	31.7	10.7	18.1	21.8	3.3	5.56	0.16	0.16	0.06	0.15
2017	10	118	4	39.4	0	0	0	0	0	14.61	10.86	111	31.9	29.3	10.2	18	23.9	4.43	8.53	0.78	0.66	0.18	0.02
2017	10	252	4	39.8	0	0	0	0	0	20.97	11.94	117	32.5	27.2	9.8	17.7	26	11.32	7.54	1.34	0.56	0.14	0.07
2017	10	510	4	39.5	0	0	0	0	0	7	9.91	100	27.1	27.4	10.1	18.4	28.4	2.88	3.26	0.61	0.18	0.03	0.04
2017	11	15	4	39.4
2017	11	61	4	39
2017	11	118	4	39.2
2017	11	252	4	39.8
2017	11	510	4	39.4
2017	12	15	4	39.1
2017	12	61	4	39
2017	12	118	4	39.4
2017	12	252	4	39.6
2017	12	510	4	39.4
2017	13	15	4	38.7
2017	13	61	4	38.9
2017	13	118	4	39
2017	13	252	4	39.5
2017	13	510	4	39.6
2017	14	15	4	39.1	0	0	0	0	0	11.32	10.88	111	32.1	29.5	10.2	18.8	24.6	3.59	5.87	1.53	0.13	0.07	0.14
2017	14	61	4	39	0	0	0	0	0	9.68	10.57	113	33.8	32	10.7	18	21.5	3.9	5.34	0.15	0.14	0.05	0.11
2017	14	118	4	39.1	0	0	0	0	0	15.03	11.07	115	32.9	29.7	10.4	18.2	24.1	4.36	9.41	0.72	0.37	0.15	0.02
2017	14	252	4	39.3	0	0	0	0	0	21.38	12.16	117	33.6	27.6	9.6	17.3	25.3	13.31	6.65	0.91	0.21	0.15	0.14
2017	14	510	4	39.5	0	0	0	0	0	7.78	10.65	110	29.5	27.7	10.3	18.4	28.4	3.72	3.57	0.31	0.12	0.06	0
2017	15	15	4	39.3
2017	15	61	4	39.1
2017	15	118	4	39.6
2017	15	252	4	39.3
2017	15	510	4	39.3
2017	16	15	4	38.9
2017	16	61	4	39.1
2017	16	118	4	40.2
2017	16	252	4	39.1
2017	16	510	4	39.3
2017	17	15	4	39.3
2017	17	61	4	39.6
2017	17	118	4	39.5
2017	17	252	4	39.1
2017	17	510	4	39.4
2017	18	15	4	38.9	0	0	0	0	0	13.64	9.59	101	29.4	30.7	10.5	17.8	20.7	5.45	7.48	0.46	0.13	0.09	0.03
2017	18	61	4	38.5	0	0	0	0	0	8.23	9.82	108	32.3	32.9	11	17.6	19.7	2.88	5	0.08	0.11	0.05	0.11
2017	18	118	4	39.2	0	0	0	0	0	12.59	10.52	109	32	30.4	10.4	17.7	22.1	3.44	8.13	0.64	0.22	0.13	0.03
2017	18	252	4	38.9	0	0	0	0	0	16.26	11.5	114	33.7	29.3	9.9	16.6	21	7.41	7.24	1.08	0.25	0.16	0.13
2017	18	510	4	39.4	0	0	0	0	0	6.69	9.78	99	26.9	27.5	10.1	17.9	24.2	2.32	3.78	0.34	0.18	0.04	0.04
2017	19	15	4	38.7
2017	19	61	4	39
2017	19	118	4	38.9
2017	19	252	4	39.1
2017	19	510	4	39.1
2017	20	15	4	39.1
2017	20	61	4	38.6
2017	20	118	4	38.9
2017	20	252	4	39.3
2017	20	510	4	39.2
2017	21	15	4	39.5	0	0	0	0	0	11.68	10.22	102	30.5	29.9	10	18.6	23.6	2.99	6.61	1.66	0.09	0.1	0.23
2017	21	61	4	39.2	0	0	0	0	0	8.69	9.86	104	32	32.4	10.6	17.9	21	2.55	5.34	0.63	0.09	0.06	0.01
2017	21	118	4	39.1	0	0	0	0	0	13.72	9.88	101	29.6	29.9	10.2	18	23.7	3.15	8.08	1.97	0.27	0.16	0.1
2017	21	252	4	39.4	0	0	0	0	0	16.92	12.13	118	34	28	9.7	17.2	24.4	8.78	6.8	0.87	0.26	0.17	0.04
2017	21	510	4	39.4	0	0	0	0	0	7.35	10.07	101	28.1	27.9	10	18.7	28.3	2.95	3.93	0.23	0.09	0.06	0.09
2017	22	15	4	38.6
2017	22	61	4	38.8
2017	22	118	4	38.6
2017	22	252	4	39.1
2017	22	510	4	39
2017	23	15	4	39.1	0	0	0	0	0	11.55	10.82	111	32.3	29.9	10.3	18.7	24.6	3.22	6.6	1.49	0.07	0.1	0.07
2017	23	61	4	39	0	0	0	0	0	7.54	10.08	108	32.7	32.5	10.7	18	21.4	2.39	4.46	0.54	0.07	0.06	0.03
2017	23	118	4	38.7	0	0	0	0	0	12.71	10.99	115	33.3	30.3	10.4	18.3	24.4	3.19	7.12	1.82	0.28	0.14	0.16
2017	23	252	4	39	0	0	0	0	0	11.98	12.49	125	34.8	27.9	10	17.4	25.3	6.58	4.51	0.56	0.2	0.11	0.03
2017	23	510	4	39.1	0	0	0	0	0	6.68	10.93	110	30.6	28	10.1	18.8	29	2.65	3.49	0.35	0.11	0.04	0.04
2017	24	15	4	39.2
2017	24	61	4	39.2
2017	24	118	4	39.1
2017	24	252	4	39.2
2017	24	510	4	39.4
2017	25	15	4	39.1	0	0	0	0	0	11.01	10.12	108	31.8	31.4	10.7	18.1	20.7	3.56	6.45	0.71	0.16	0.08	0.06
2017	25	61	4	39.8	0	0	0	0	0	5.1	9.35	103	31.1	33.3	11	17.7	18.9	2.69	2.15	0.12	0.04	0.04	0.07
2017	25	118	4	39.4	0	0	0	0	0	14.58	10.16	108	31	30.5	10.6	17.9	22.7	5.68	7.96	0.49	0.34	0.1	0.01
2017	25	252	4	39.3	0	0	0	0	0	15.43	11.17	113	33.6	30.1	10.2	16.7	20.3	7.62	6.59	0.79	0.29	0.13	0.01
2017	25	510	4	39.3	0	0	0	0	0	6.8	10.03	103	28	27.9	10.3	17.6	23.1	3.34	2.96	0.33	0.12	0.05	0.01
2017	26	15	4	39.3
2017	26	61	4	41
2017	26	118	4	39.4
2017	26	252	4	39.3
2017	26	510	4	39.4
2017	27	15	4	39.3	0	0	0	0	0	13.72	10.59	110	31.3	29.6	10.3	18.6	24.1	5.14	7.45	0.78	0.1	0.11	0.15
2017	27	61	4	39.7	0	0	0	0	0	7.75	10.39	114	33	31.8	11	18	21.2	3.21	3.87	0.49	0.06	0.06	0.06
2017	27	118	4	39.1	0	0	0	0	0	14.04	10.26	109	30.4	29.6	10.6	18.2	23.8	5.14	7.78	0.67	0.28	0.13	0.04
2017	27	252	4	38.7	0	0	0	0	0	12.66	12.18	120	33.7	27.7	9.9	17.1	24.8	4.28	7.55	0.24	0.19	0.15	0.26
2017	27	510	4	39.2	0	0	0	0	0	6.36	10.27	105	28.6	27.9	10.3	18.8	28.5	2.33	3.54	0.35	0.08	0.05	0.02
2017	28	15	4	39.2
2017	28	61	4	39.2
2017	28	118	4	39
2017	28	252	4	39.2
2017	28	510	4	39.3
2017	29	15	4	39.3	0	0	0	0	0	11.72	10.06	102	30	29.9	10.2	18.5	24.1	3.57	7.29	0.63	0.14	0.09	0.01
2017	29	61	4	39.1	0	0	0	0	0	10.83	10.35	113	33.5	32.4	10.9	17.9	21.4	3.93	5.84	0.83	0.08	0.1	0.05
2017	29	118	4	39.1	0	0	0	0	0	13.79	9.77	100	29.1	29.8	10.3	18.1	23.8	4.44	8.14	0.78	0.23	0.15	0.05
2017	29	252	4	39.3	0	0	0	0	0	12.44	12.09	118	33.9	28	9.7	17.2	24.8	4.9	6.41	0.76	0.14	0.2	0.03
2017	29	510	4	39.3	0	0	0	0	0	7.24	10.1	102	28.3	28	10.1	18.9	29.5	2.98	3.53	0.51	0.1	0.06	0.05
2017	30	15	4	39
2017	30	61	4	38.9
2017	30	118	4	38.9
2017	30	252	4	39
2017	30	510	4	39.6
2017	31	15	4	39.2	0	0	0	0	0	12	10.62	110	31.9	30	10.3	18.5	23.9	3.66	6.67	1.31	0.11	0.08	0.17
2017	31	61	4	39	0	0	0	0	0	7.93	10.35	110	33.2	32.1	10.7	17.6	20.7	2.61	4.82	0.12	0.09	0.09	0.19
2017	31	118	4	39.2	0	0	0	0	0	13.6	9.81	102	29.4	29.9	10.4	18	23.5	4	8.58	0.57	0.23	0.17	0.05
2017	31	252	4	39.3	0	0	0	0	0	12.73	11.97	117	33.5	28	9.8	17	24.7	4.37	7.28	0.81	0.11	0.12	0.05
2017	31	510	4	39.6	0	0	0	0	0	7.76	10.1	103	28.6	28.3	10.2	18.9	28.8	3.16	3.76	0.59	0.09	0.05	0.1
2017	32	15	4	39
2017	32	61	4	38.9
2017	32	118	4	39
2017	32	252	4	39.3
2017	32	510	4	39.3
2017	33	15	4	39.2
2017	33	61	4	38.8
2017	33	118	4	38.8
2017	33	252	4	39.1
2017	33	510	4	39.3
2017	34	15	4	39.6
2017	34	61	4	38.8
2017	34	118	4	39.2
2017	34	252	4	39.5
2017	34	510	4	39.5
2017	35	15	4	39.3	0	0	0	0	0	11.86	10.85	109	32.6	30	10	18.3	22.9	4.27	5.68	1.42	0.09	0.06	0.33
2017	35	61	4	39.2	0	0	0	0	0	9.4	10.4	110	33.6	32.3	10.6	17.4	19.6	3.56	4.97	0.6	0.14	0.06	0.07
2017	35	118	4	39	0	0	0	0	0	12.69	10.08	103	30.7	30.5	10.2	18.2	23.1	3.94	6.63	1.68	0.22	0.13	0.08
2017	35	252	4	39.2	0	0	0	0	0	11.59	12.38	121	35.2	28.4	9.8	17.3	24.4	4.24	6.54	0.43	0.11	0.11	0.17
2017	35	510	4	39.6	0	0	0	0	0	7.31	10.33	104	29.3	28.4	10.1	18.7	28	2.98	3.59	0.54	0.1	0.05	0.04
2017	36	15	4	38.9
2017	36	61	4	38.7
2017	36	118	4	39.2
2017	36	252	4	39.6
2017	36	510	4	39.2
2017	37	15	4	38.8
2017	37	61	4	38.9
2017	37	118	4	39.1
2017	37	252	4	39.1
2017	37	510	4	39.4
2017	38	15	4	39
2017	38	61	4	39
2017	38	118	4	38.9
2017	38	252	4	39.2
2017	38	510	4	39.5
2017	39	15	4	39.2	0	0	0	0	0	13.08	10.53	107	31.8	30.2	10.1	18.1	22.8	5.24	5.55	1.9	0.09	0.05	0.25
2017	39	61	4	39.2	0	0	0	0	0	9.55	10.26	109	33.3	32.4	10.6	17.5	20	3.85	4.29	1.05	0.17	0.08	0.11
2017	39	118	4	39.2	0	0	0	0	0	13.41	10.17	107	31	30.5	10.6	18.6	23.8	4.44	8.25	0.33	0.22	0.14	0.03
2017	39	252	4	39.4	0	0	0	0	0	14.73	12.58	124	35.8	28.4	9.9	17.3	24.7	7.07	5.57	1.66	0.14	0.13	0.15
2017	39	510	4	39.6	0	0	0	0	0	9.09	10.24	105	28.9	28.2	10.2	18.7	28.4	4.78	3.74	0.35	0.11	0.06	0.06
2017	40	15	4	39.4
2017	40	61	4	39.8
2017	40	118	4	39
2017	40	252	4	39
2017	40	510	4	39.2
2017	41	15	4	39.3
2017	41	61	4	38.9
2017	41	118	4	39
2017	41	252	4	39.1
2017	41	510	4	39.3
2017	42	15	4	39.5	0	0	0	0	0	17.28	10.57	110	31.6	29.9	10.4	18.1	23.3	8.85	7.17	1.07	0.08	0.09	0.02
2017	42	61	4	38.9	0	0	0	0	0	8.85	10.19	110	32.9	32.3	10.8	17.6	20.3	3.18	4.15	1.19	0.19	0.05	0.1
2017	42	118	4	39	0	0	0	0	0	14.99	10.34	107	31.3	30.3	10.3	18.5	23.7	5.31	8.35	0.87	0.3	0.14	0.02
2017	42	252	4	39.2	0	0	0	0	0	12.85	11.9	118	33.7	28.3	9.9	17.1	24.8	5.69	4.97	1.83	0.12	0.1	0.14
2017	42	510	4	39.2	0	0	0	0	0	7.39	10.26	105	29.1	28.3	10.2	18.8	28.5	2.8	3.77	0.57	0.11	0.05	0.09
2018	0	26	5	39	0	0	0	0	0	12.71	11.4	119	34.8	30.6	10.4	17.5	20.1	3.82	8.07	0.27	0.37	0.08	0.09
2018	0	38	5	38.8	0	0	0	0	0	12.26	10.67	116	32.1	30	10.9	17.2	22.5	4.91	6.72	0.43	0.09	0.07	0.03
2018	0	92	5	39.4	0	0	0	0	0	11.03	10.51	114	33.7	32	10.9	18.1	21.3	3.47	7.24	0.14	0.07	0.07	0.02
2018	0	143	5	39.8	0	0	0	0	0	12.35	12.34	119	34.1	27.6	9.7	17.3	23	5.33	6.55	0.25	0.1	0.06	0.06
2018	0	150	5	39.7	0	0	0	0	0	7.36	10.97	119	33.8	30.8	10.9	17.9	23	2.28	4.62	0.37	0.05	0.03	0.01
2018	1	26	5	38.8
2018	1	38	5	39
2018	1	92	5	38.7
2018	1	143	5	39.5
2018	1	150	5	39.2
2018	2	26	5	39	34.6	0	0	44.3937	1.657	10.59	11.64	121	35.5	30.5	10.4	17.5	19.9	3.16	6.9	0.16	0.14	0.08	0.15
2018	2	38	5	40	35	0	0	20.2871	1.32812	6.97	10.84	116	32.2	29.8	10.7	17.2	22.7	2.5	3.98	0.42	0.03	0.03	0.01
2018	2	92	5	40.1	0	0	0	101.693	2.01154	13.92	10.13	111	31.8	31.4	10.9	18	21.6	7.04	6.3	0.22	0.07	0.04	0.25
2018	2	143	5	39.5	0	0	0	145.243	2.16508	9.18	11.92	117	32.9	27.6	9.8	17.1	22.1	3.46	5.3	0.3	0.06	0.03	0.02
2018	2	150	5	39.3	0	0	0	33.0681	1.53235	4.42	11.05	121	33.9	30.7	10.9	17.9	22.4	1.58	2.54	0.15	0.06	0.01	0.08
2018	3	26	5	39.5
2018	3	38	5	39.6
2018	3	92	5	40.1
2018	3	143	5	40
2018	3	150	5	41.3
2018	4	26	5	41.7	0	0	10	175115	5.24332	5.93	10.11	110	31	30.7	10.9	17.2	19.7	3.06	2.5	0.19	0.06	0.02	0.11
2018	4	38	5	41.5	0	0	20	106817	5.02864	6.94	9.94	107	29.6	29.8	10.8	16.9	22.6	3.3	3.17	0.14	0.03	0.02	0.28
2018	4	92	5	41.8	34.5	0	0	315074	5.49841	6.91	9.01	102	29.2	32.4	11.3	17.2	19.1	3.47	3.1	0.09	0.06	0.02	0.16
2018	4	143	5	41.6	0	0	0	174751	5.24242	5.19	10.04	98	27.9	27.8	9.8	16.8	23.8	2.36	2.49	0.18	0.04	0.01	0.12
2018	4	150	5	42.1	0	1	0	154958	5.19022	3.86	9.82	107	29.8	30.4	10.9	17.6	22.4	2.13	1.32	0.28	0.06	0.01	0.06
2018	5	26	5	41.9
2018	5	38	5	41.8
2018	5	92	5	41.5
2018	5	143	5	42
2018	5	150	5	41.7
2018	6	26	5	40.9	0	1	0	219661	5.34175	5.32	10.58	112	31.1	29.4	10.5	17.5	21.2	2.46	2.32	0.41	0.04	0.02	0.07
2018	6	38	5	41.2	0	1	0	94426.8	4.9751	3.82	10.25	112	29.9	29.2	10.9	17.4	24.9	1.7	1.64	0.38	0.02	0	0.07
2018	6	92	5	41.3	0	1	0	823909	5.91588	7.71	9.66	108	30	31	11.2	18	22.5	4.42	2.67	0.19	0.09	0.01	0.33
2018	6	143	5	41.5	34.66	1	0	194630	5.28921	4.29	10.54	105	29.2	27.7	10	17.2	23.1	2.33	1.64	0.04	0.02	0.01	0.24
2018	6	150	5	41.2	0	1	0	148282	5.17109	3.4	9.55	107	28.2	29.5	11.2	18.2	25.7	2.2	0.86	0.07	0.04	0	0.23
2018	7	26	5	41
2018	7	38	5	41.1
2018	7	92	5	41.3
2018	7	143	5	41.4
2018	7	150	5	41.4
2018	8	26	5	40.8	0	1	640	140926	5.149	4.56	9.7	103	29.1	30	10.6	17.4	20.4	1.67	2.3	0.37	0.05	0.02	0.15
2018	8	38	5	40.5	0	1	10	85317	4.93104	3.17	9.29	99	27.6	29.7	10.6	17.1	23.3	0.86	1.8	0.17	0.02	0.02	0.3
2018	8	92	5	40.9	0	1	160	302937	5.48135	5.18	8.77	98	27.4	31.2	11.2	18.2	22.2	2.68	2.21	0.16	0.05	0.01	0.06
2018	8	143	5	41.5	0	1	320	232546	5.36651	4.59	9.84	97	27.5	27.9	9.9	17.1	22.9	2.51	1.76	0.19	0.03	0.01	0.1
2018	8	150	5	41	0	1	320	66876.1	4.82528	1.87	8.12	90	24.2	30.4	11	18.3	24.8	1.02	0.68	0.05	0.02	0	0.1
2018	9	26	5	40.5
2018	9	38	5	40.3
2018	9	92	5	40.1
2018	9	143	5	41.2
2018	9	150	5	40.3
2018	10	26	5	40.5	0	1	640	26879.6	4.42944	5.5	10.11	104	30.4	30.1	10.3	17.4	20.6	0.98	3.79	0.54	0.03	0.05	0.13
2018	10	38	5	39.2	0	1	320	704.672	2.8486	4.28	9.2	101	28.1	30.5	11	17.4	23.2	0.23	3.18	0.64	0.03	0.06	0.14
2018	10	92	5	40.4	0	1	160	52361.7	4.71902	5.07	8.92	97	28	31.3	10.8	18.2	22	1.23	3.48	0.07	0.03	0.06	0.2
2018	10	143	5	40.7	0	1	640	112314	5.05044	3.47	8.64	85	24.1	27.9	9.9	16.9	23.3	1.26	1.9	0.21	0.04	0.03	0.02
2018	10	150	5	40	0	1	320	3148.12	3.49819	2.63	8.82	97	27	30.6	11	18	24.2	0.31	1.92	0.31	0.02	0.04	0.03
2018	11	26	5	40
2018	11	38	5	39.5
2018	11	92	5	40
2018	11	143	5	40.4
2018	11	150	5	39.9
2018	12	26	5	39.6
2018	12	38	5	39.5
2018	12	92	5	39.7
2018	12	143	5	40
2018	12	150	5	39.8
2018	13	26	5	39.1
2018	13	38	5	39.2
2018	13	92	5	39.3
2018	13	143	5	40.2
2018	13	150	5	40.8
2018	14	26	5	39.4	0	1	480	8465.89	3.92772	5.79	10.73	111	32.8	30.6	10.3	17.4	20.6	1.31	3.47	0.73	0.03	0.03	0.21
2018	14	38	5	39.1	0	1	320	43.2003	1.64543	6.85	9.85	109	30.3	30.8	11	18.6	24.5	0.19	5.89	0.35	0.01	0.07	0.34
2018	14	92	5	39.4	0	1	160	1050.48	3.0218	4.17	9.43	105	30.2	32	11.1	20.1	23	0.36	2.75	0.93	0.02	0.02	0.09
2018	14	143	5	40.1	0	1	320	132.669	2.12603	2.88	9.69	101	28.6	29.5	10.4	20.4	25.7	0.3	1.91	0.55	0.02	0.01	0.08
2018	14	150	5	40.2	0	1	160	243.348	2.38801	2.97	8.97	99	27.9	31.1	11.1	18.6	24.5	0.54	1.91	0.46	0.03	0.01	0.03
2018	15	26	5	40.1
2018	15	38	5	39.3
2018	15	92	5	39.3
2018	15	143	5	39.8
2018	15	150	5	39.9
2018	16	26	5	38.5
2018	16	38	5	38.8
2018	16	92	5	39.2
2018	16	143	5	39.9
2018	16	150	5	39.6
2018	17	26	5	38.8
2018	17	38	5	39.1
2018	17	92	5	39
2018	17	143	5	39.6
2018	17	150	5	39.2
2018	18	26	5	39.1	0	1	240	8119.43	3.90958	7.84	10.05	109	31	30.8	10.8	17.4	20	2.47	4.77	0.43	0.07	0.05	0.04
2018	18	38	5	39.1	0	1	320	39.0051	1.60212	8.15	9.5	106	29.4	31	11.1	18.5	24.5	1.95	5.18	0.93	0.05	0.04	0.01
2018	18	92	5	39.5	0	1	40	3151.55	3.49866	5.66	9.15	103	30	32.7	11.2	19.4	21.6	0.97	3.89	0.73	0.05	0.02	0.01
2018	18	143	5	39.5	0	1	240	1993.54	3.29984	6.19	9.52	101	28.7	30.2	10.6	21.3	26.6	1.26	4.29	0.46	0.09	0.06	0.02
2018	18	150	5	39.1	0	1	160	760.436	2.88163	3.55	9.02	101	28.2	31.2	11.2	18.2	24.1	0.83	2.12	0.18	0.2	0.01	0.21
2018	19	26	5	39.1
2018	19	38	5	38.9
2018	19	92	5	39.2
2018	19	143	5	39.8
2018	19	150	5	39.2
2018	20	26	5	38.7
2018	20	38	5	39.8
2018	20	92	5	39
2018	20	143	5	39.6
2018	20	150	5	38.8
2018	21	26	5	38.7	0	1	320	0	0	9.63	10.72	113	32.5	30.3	10.6	17.6	21.4	2.55	6.67	0.11	0.11	0.05	0.15
2018	21	38	5	40.7	0	1	120	171.779	2.23749	5.55	9.94	108	30.1	30.3	10.9	18.4	25.2	0.41	4.76	0.13	0.03	0.03	0.19
2018	21	92	5	38.9	0	1	40	0	0	9.06	9.69	105	30.7	31.6	10.8	19.2	22.8	2.71	5.83	0.4	0.05	0.04	0.02
2018	21	143	5	39.5	0	1	320	0	0	7.88	10.3	106	30.5	29.6	10.3	20.3	25.4	2.21	5.07	0.42	0.13	0.04	0.02
2018	21	150	5	38.9	0	1	160	0	0	5.17	10.07	106	30.6	30.4	10.6	18.2	25.7	1.36	3.52	0.11	0.04	0.03	0.11
2018	0	13	6	39.6	0	0	0	0	0	11.26	11.17	117	33.3	29.8	10.5	17.7	23.7	3.51	7.23	0.28	0.06	0.09	0.09
2018	0	15	6	39	0	0	0	0	0	10.25	11.13	117	32.4	29.1	10.5	17.4	22.2	1.93	7.78	0.23	0.07	0.05	0.18
2018	0	41	6	38.8	0	0	0	0	0	10.56	12	119	32.4	27	9.9	19.3	25.4	2.76	6.92	0.63	0.1	0.05	0.09
2018	0	99	6	39.2	0	0	0	0	0	7.19	10.64	111	32.4	30.5	10.4	16.1	22.1	2.33	4.5	0.18	0.06	0.04	0.08
2018	0	220	6	39	0	0	0	0	0	8.85	12.49	130	35.2	28.2	10.4	18.1	26.5	2.05	5.91	0.69	0.06	0.06	0.08
2018	1	13	6	39.3
2018	1	15	6	38.8
2018	1	41	6	38.7
2018	1	99	6	39
2018	1	220	6	38.9
2018	2	13	6	39.1	0	0	0	0	0	10.31	11.89	125	35.8	30.1	10.5	17.7	23.2	2.71	7	0.27	0.04	0.05	0.23
2018	2	15	6	39.2	0	0	0	0	0	9.22	11.13	115	32.4	29.1	10.4	17.5	21.6	1.88	6.4	0.75	0.04	0.04	0.11
2018	2	41	6	38.9	0	0	0	0	0	10.12	12.16	118	32.9	27.1	9.7	19.4	25.3	3.18	6.46	0.31	0.09	0.07	0.01
2018	2	99	6	39.6	0	0	0	0	0	8.39	11.19	115	34	30.4	10.3	16.2	21.7	3.6	4.39	0.3	0.04	0.03	0.02
2018	2	220	6	40.1	0	0	0	0	0	9.15	11.85	121	33.1	27.9	10.2	18	25.7	3.53	5.28	0.17	0.05	0.04	0.09
2018	3	13	6	40
2018	3	15	6	39.1
2018	3	41	6	38.6
2018	3	99	6	39.2
2018	3	220	6	39.1
2018	4	13	6	39.1	0	0	0	0	0	10.72	12.19	130	35.8	29.4	10.6	17.7	22.9	2.32	7.76	0.08	0.13	0.05	0.37
2018	4	15	6	39.2	0	0	0	0	0	9.46	11.41	121	32.9	28.8	10.6	17.8	22.9	1.82	6.87	0.61	0.08	0.06	0.02
2018	4	41	6	39.2	0	0	0	0	0	10.48	11.73	117	33	28.1	10	18.8	21.9	2.92	6.79	0.51	0.12	0.06	0.07
2018	4	99	6	39.2	0	0	0	0	0	6.87	11	116	34.2	31.1	10.5	15.9	22.3	1.77	4.7	0.15	0.11	0.05	0.08
2018	4	220	6	40.1	0	0	0	0	0	8.99	12.84	132	35.5	27.7	10.3	18	24.5	2.53	5.6	0.53	0.07	0.05	0.2
2018	5	13	6	39.7
2018	5	15	6	39.3
2018	5	41	6	39
2018	5	99	6	39.5
2018	5	220	6	39.8
2018	6	13	6	39	0	0	0	0	0	11.13	12.1	128	36.5	30.2	10.6	17.7	23.5	2.17	7.93	0.49	0.04	0.09	0.41
2018	6	15	6	38.9	0	0	0	0	0	9.74	10.76	113	31.2	29	10.5	17.5	22.3	2.03	6.52	0.92	0.07	0.04	0.16
2018	6	41	6	38.9	0	0	0	0	0	9.49	11.04	111	29.9	27	10.1	19.5	25.6	2.54	6.19	0.52	0.07	0.06	0.12
2018	6	99	6	39.4	0	0	0	0	0	6.98	10.7	114	32.7	30.6	10.6	16.3	22.9	2.02	4.54	0.1	0.02	0.04	0.25
2018	6	220	6	40.1	0	0	0	0	0	8.42	11.73	121	32.4	27.6	10.4	17.9	26.4	2.26	5.6	0.44	0.04	0.04	0.04
2018	7	13	6	39.2
2018	7	15	6	39.2
2018	7	41	6	39
2018	7	99	6	39.3
2018	7	220	6	39.7
2018	8	13	6	39.1	0	0	0	0	0	9.35	11.46	120	35.2	30.7	10.5	17.5	22.4	1.75	6.71	0.46	0.04	0.07	0.31
2018	8	15	6	39	0	0	0	0	0	9.5	10.57	113	31.1	29.4	10.7	17.3	21.2	3.17	5.74	0.33	0.06	0.03	0.17
2018	8	41	6	39.4	0	0	0	0	0	11.73	10.58	106	28.6	27	10	19.5	24.9	5.27	5.58	0.48	0.08	0.04	0.28
2018	8	99	6	39.3	0	0	0	0	0	6.29	10.36	108	31.7	30.6	10.5	16	21.6	2.1	3.76	0.24	0.05	0.04	0.1
2018	8	220	6	39	0	0	0	0	0	8.48	11.7	122	32.6	27.9	10.4	18	25.9	1.99	5.98	0.2	0.06	0.06	0.2
2018	9	13	6	39
2018	9	15	6	38.7
2018	9	41	6	38.8
2018	9	99	6	38.9
2018	9	220	6	38.8
2018	10	13	6	39.1	0	0	0	0	0	9.52	11.55	123	35	30.3	10.6	17.7	23.9	2.32	6.6	0.47	0.04	0.06	0.04
2018	10	15	6	39	0	0	0	0	0	10.53	10.38	110	30.1	29	10.6	17.4	22.1	3.17	6.32	0.89	0.07	0.03	0.05
2018	10	41	6	39.1	0	0	0	0	0	9.1	10.71	105	29	27.1	9.8	19.7	25.7	2.57	5.91	0.45	0.1	0.05	0.02
2018	10	99	6	39	0	0	0	0	0	5.79	10.24	107	31.6	30.8	10.4	16.2	22.3	1.67	3.74	0.27	0.05	0.05	0.02
2018	10	220	6	38.8	0	0	0	0	0	7.58	11.62	121	33	28.4	10.4	18.2	26.2	2.08	5.04	0.26	0.06	0.05	0.08
2018	11	13	6	39.2
2018	11	15	6	39.1
2018	11	41	6	38.6
2018	11	99	6	38.9
2018	11	220	6	38.8
2018	12	13	6	39.5
2018	12	15	6	39.2
2018	12	41	6	38.2
2018	12	99	6	39.2
2018	12	220	6	39.1
2018	13	13	6	39.1
2018	13	15	6	38.9
2018	13	41	6	38.7
2018	13	99	6	38.9
2018	13	220	6	38.6
2018	14	13	6	39.2	0	0	0	0	0	11.29	11.37	120	34.6	30.5	10.6	17.6	23.4	2.8	7.7	0.53	0.06	0.07	0.13
2018	14	15	6	38.9	0	0	0	0	0	9	10.85	114	31.9	29.4	10.5	17.5	22.5	2.52	5.59	0.7	0.05	0.03	0.12
2018	14	41	6	38.8	0	0	0	0	0	9.01	10.69	107	29.1	27.3	10	19.8	26.2	2.52	5.97	0.39	0.06	0.05	0.01
2018	14	99	6	39.1	0	0	0	0	0	6.77	10.19	108	31.6	31.1	10.6	16.1	22.3	2.63	3.86	0.11	0.03	0.04	0.09
2018	14	220	6	38.9	0	0	0	0	0	8.86	11.49	120	32.7	28.5	10.4	18.2	26.2	2.51	5.98	0.1	0.05	0.06	0.15
2018	15	13	6	39.7
2018	15	15	6	39.1
2018	15	41	6	38.9
2018	15	99	6	39.3
2018	15	220	6	38.6
2018	16	13	6	39.6
2018	16	15	6	39.3
2018	16	41	6	38.7
2018	16	99	6	39.2
2018	16	220	6	38.8
2018	17	13	6	38.5
2018	17	15	6	39
2018	17	41	6	38.7
2018	17	99	6	38.8
2018	17	220	6	38.2
2018	18	13	6	39.6	0	0	0	0	0	10.82	10.74	113	31.9	29.7	10.5	17.6	24.1	3.27	6.65	0.71	0.11	0.06	0.03
2018	18	15	6	39.1	0	0	0	0	0	9.03	10.1	108	29.2	28.9	10.6	17.6	22.8	2.34	5.84	0.62	0.09	0.04	0.1
2018	18	41	6	39.2	0	0	0	0	0	10.94	11.15	113	31.3	28.1	10.1	19.2	23.1	3.44	6.77	0.51	0.1	0.05	0.08
2018	18	99	6	39	0	0	0	0	0	6.86	9.82	110	30.5	31.1	11.2	15.9	22.5	2.77	3.61	0.37	0.06	0.04	0.01
2018	18	220	6	38.9	0	0	0	0	0	9	11.62	120	32.6	28.1	10.3	18.1	25.3	2.79	5.61	0.44	0.08	0.06	0.02
2018	19	13	6	39.8
2018	19	15	6	39.4
2018	19	41	6	39.5
2018	19	99	6	39.6
2018	19	220	6	39
2018	20	13	6	39.1
2018	20	15	6	38.9
2018	20	41	6	38.8
2018	20	99	6	39
2018	20	220	6	38.9
2018	21	13	6	38.9	0	0	0	0	0	11.08	11.12	115	32.9	29.6	10.3	17.6	25	2.92	7.36	0.62	0.07	0.07	0.03
2018	21	15	6	39.1	0	0	0	0	0	4.53	10.34	107	29.4	28.4	10.4	17.5	23.8	1.79	2.28	0.41	0.03	0.01	0
2018	21	41	6	38.8	0	0	0	0	0	8.98	11.22	110	30.1	26.8	9.8	19.5	26.9	2.17	5.95	0.65	0.05	0.04	0.12
2018	21	99	6	38.9	0	0	0	0	0	6.23	10.97	114	33.7	30.7	10.4	16.3	22.8	1.84	3.83	0.44	0.06	0.05	0.01
2018	21	220	6	38.9	0	0	0	0	0	8.97	11.35	117	31.4	27.7	10.3	18.4	27.6	2.3	6.29	0.14	0.06	0.04	0.13
